# Supplementary material
Source: publisher site journal article supplement (https://static.cambridge.org/content/id/urn:cambridge.org:id:article:S1368980019003999/resource/name/S1368980019003999supp001.docx)
Supplement: Supplementary file 1 [file S1368980019003999supp001.docx]

**The relationship between joining a U.S. free trade agreement (FTA) and processed food sales, 2002-2016: a comparative interrupted time-series analysis: supplementary material**

## Definitions of product categories used to generate outcomes

| **Outcome** | **Data elements** | **Definition (from Euromonitor International)*** |
| --- | --- | --- |
| Minimally processed foods (total sales) | Eggs | Includes all fresh poultry eggs, egg albumen (egg whites) as well as liquid or dry hen eggs. |
| Fish and seafood | This is the aggregation of fish, crustaceans, mollusks and cephalopods. Includes: fresh raw (chilled and frozen) packaged and unpackaged unprocessed fish and seafood. Chilled and frozen fish and seafood can be cleaned, gutted, peeled/trimmed/filleted/cut to a different extent, but not cooked and no sauces, herbs or condiments can be added. Excludes: All packaged/processed fish and seafood products typically sold via the self-service counters in retail outlets. |
| Fruits | This is the aggregation of fresh apples, bananas, cherries, cranberries & blueberries, grapefruit & pomelo, grapes, kiwi fruit, lemons & limes, oranges, tangerines & mandarins, peaches & nectarines, pears &quinces, plums & sloes, pineapples, strawberries and other fruits, whether sold packaged or unpackaged. Dried fruits and fruit snacks whether sold packaged or by weight are included. Large fruit, such as watermelons and melons, cut and packed by retailers at their premises are also included. All other packaged, processed fruit products such as fresh cut fruits marketed as fresh fruit snacks and salads, cut frozen fruits and berries, jams & preserves, canned/preserved fruits, fruit juices and juice drinks are excluded. |
| Meat | This is the aggregation of beef & veal, lamb, mutton & goat, pork, poultry and other meat. Only includes fresh uncooked and unprocessed meat whether packaged or unpackaged. All industrially packaged/processed meat products typically sold via the self-service or delicatessen counters in retail outlets are excluded. This category does not cover offal, animal fat, skins and hides. |
| Nuts | This includes unpackaged nuts used mainly as dessert or table nuts and is the aggregation of almonds, walnuts, pistachio, peanuts (or groundnuts) and other nuts. Note: nuts used mainly for flavoring beverages and the extraction of oil or fat are excluded, as are chewing/stimulant nuts: areca/betel nuts, kola nuts, illipe nuts, karate/shea nuts, tung nuts, oil palm nuts, etc. All packaged, processed nuts such as roasted nuts and raw but de-shelled nuts are excluded. |
| Pulses | This category is limited to leguminous crops harvested only for dry grains, excluding crops harvested green for food (green peas, green bean, string beans, etc.), which are considered to be vegetables. Also exclude those used mainly for the extraction of oil (e.g., soybeans) and those leguminous crops such as clover and alfalfa, which seeds are almost used exclusively for sowing purpose. This is the aggregation of dry beans, peas and other pulses. |
| Starchy roots | This is the aggregation of unpackaged and unprocessed potatoes, cassava, sweet potatoes and other roots. Starchy root-based products such as chips, crisps as well as flour are excluded. |
| Vegetables | This is the aggregation of tomatoes, onions and other vegetables. Only include fresh uncooked and unprocessed vegetables (packaged and unpackaged) and unpackaged processed vegetables, eg. salted vegetables sold from open market. All packaged/processed vegetable products are excluded. |
| Processed culinary ingredients (total sales) | Butter and margarine | This is the aggregation of butter and margarine. |
| Drinking milk products | This is the aggregation of fresh/pasteurised milk, long-life/UHT milk, goat milk, flavoured milk drinks, non-dairy milk alternatives, powder milk and flavoured powder milk drinks. |
| Oils and fats | This is the aggregation of olive oil, vegetable and seed oil, cooking fats, butter, margarine, and spreadable oils and fats. |
| Other dairy | This is the aggregation of chilled and shelf stable desserts, chilled snacks, coffee whiteners, condensed/evaporated milk, cream, and fromage frais and quark. |
| Processed fruits and vegetables | This is the aggregation of shelf stable fruit and vegetables and frozen fruit and vegetables. |
| Rice, pasta, and noodles | This is the aggregation of rice, noodles and pasta. Includes: Pre-packaged noodles. Excludes: Any noodles, pasta or rice bought loose, bulk and/or unpackaged. Excludes: Any noodle-based ready meals, which would be tracked under ready meals. |
| Sugar and sweeteners | All raw sugar products and natural sweeteners, whether sold packaged or unpackaged, including yellow/brown sugar, fructose, maltose, maple sugar, molasses, corn syrup, glucose, table sugar (also known as granulated refined white sugar), icing sugar, castor sugar, etc. Honey is included here. Note: Artificial sweeteners such as aspartame and acesulfame-K are excluded. Also exclude sugar alcohol such as erythritol, xylitol and mannitol, which are commonly used for replacing sucrose in foodstuffs and often used in combination with high intensity artificial sweeteners. |
| Ultra-processed products (total sales) | Baked goods | This is the aggregation of bread, pastries and cakes. Note: Baked goods from in-store bakeries are classified under unpackaged/artisanal, not packaged/industrial. While they may be finished on-site, they are often prepared, then frozen or par-baked, at other locations. Such production models are very important for supermarket in-store bakeries, which have in the past been used to drive traffic and fill stores with appetizing aromas, but for which the labor resources required to run a full-service scratch bakery are not always available |
| Breakfast cereals | This is the aggregation of ready-to-eat (RTE) and hot cereals. |
| Cheese | This is the aggregation of processed and unprocessed cheese. |
| Chocolate confectionary | This is the aggregation of tablets, countlines, bagged selflines/softlines, boxed assortments, seasonal chocolate, chocolate with toys, alfajores and other chocolate confectionery. Note that chocolate overtly positioned for baking/cooking purposes is excluded from Euromonitor International's confectionery coverage. |
| Ice cream and frozen desserts | This is the aggregation of all sales of ice cream and frozen desserts |
| Processed meat and seafood | This is the aggregation of processed meat, processed seafood and meat substitutes. |
| Ready meals | This is the aggregation of canned/preserved, frozen, dried, chilled ready meals, dinner mixes, frozen pizza, chilled pizza and prepared salads. Note: Ready meals are products that have had recipe ''skills'' added to them by the manufacturer, resulting in a high degree of readiness, completion and convenience. Ready meals are generally accepted to be complete meals that require few or no extra ingredients, however, in the case of canned/preserved ready meals, the term also encompasses meal ''centers’; for dinner mixes, the term encompasses part meals. Some ready meals may require cooking; others may simply need reheating, prior to serving. |
| Sauces, dressings, and condiments | This is the aggregation of tomato pastes and purees, bouillon/stock cubes, herbs and spices, monosodium glutamate (MSG), table sauces, soy based sauces, pasta sauces, wet/cooking sauces, dry sauces/powder mixes, ketchup, mayonnaise, mustard, salad dressings, vinaigrettes, dips, pickled products, and other sauces, dressings and condiments. |
| Savory snacks | This is the aggregation of fruit snacks, chips/crisps, extruded snacks, tortilla/corn chips, popcorn, pretzels, nuts and other sweet and savory snacks |
| Soup | This is the aggregation of canned/preserved, dehydrated, instant, chilled, UHT and frozen soup. |
| Spreads | This is the aggregation of jams and preserves, honey, chocolate spreads, nut based spreads, and yeast based spreads |
| Sugar confectionary | This is the aggregation of mints, boiled sweets, pastilles, gums, jellies and chews, toffees, caramels, nougat, medicated confectionery, lollipops, liquorice and other sugar confectionery. |
| Sweet biscuits, snack bars, and fruit snacks | This is the aggregation of biscuits and snack bars. |
| Yogurt and sour milk products | This is the aggregation of yoghurt and sour milk drinks. |
| Carbonates | Sweetened, non-alcoholic drinks containing carbon dioxide are included here. All carbonated products containing fruit juice (“sparkling juices”) are included here, unless they are tea-based (these are included in carbonated RTD tea) or carbonated Energy drinks, which are included in Energy Drinks. Carbonated bottled water is also excluded. Carbonates are an aggregation of cola carbonates and non-cola carbonates, whether regular or low calorie. Euromonitor International includes both naturally and artificially-sweetened carbonates. |
| Concentrates | This is the aggregation of liquid concentrates and powder concentrates. |
| Juice | This category covers all still packaged juice obtained from fruits or vegetables by mechanical processes, reconstituted or fresh, often including pulp or fruit/vegetable puree. All unpackaged juices are excluded. Only still drinks are included here. Carbonated varieties are included non-cola carbonates. Juice-flavoured milk drinks and fruit shakes which are primarily milk are excluded–these are instead tracked in Packaged Foods Dairy. However, if the juice component is greater, the product is to be excluded from Packaged Foods Dairy coverage and tracked under the relevant category (based on % juice content) within Soft Drinks juice. This sector is the aggregation of 100% juice, nectars (25-99% juice content), juice drinks (up to 24% juice content), and fruit-flavored drinks (no juice content). |
| Ready-to-drink coffee | Includes packaged ready-to-drink coffee, consumed either hot or cold, made using a base of either brewed coffee or coffee extract. Excludes all coffee flavored milk drinks that primarily target children, or where coffee is one of a number of flavors within the brand range. Leading brands in off-trade volume include Georgia, Nescafé and Suntory Boss. |
| Ready-to-drink tea | This category includes all packaged products based on brewed tea or tea extract. May be sweetened or unsweetened, carbonated or still, with a wide variety of different flavorings. May contain juice. |
| Sports and energy drinks | This category is the aggregation of sports and energy drinks. |
| Baby food (total sales) | Baby food | This is the aggregation of milk formula, prepared, dried and other baby food. |
| Fresh/processed meat and seafood (sales ratio) | Meat | *See above* – Minimally processed foods: Meat |
| Fish and seafood | *See above* – Minimally processed foods: Fish and seafood |
| Processed meat and seafood | *See above* – Ultra-processed products: Processed meat and seafood |
| Fresh/processed fruits and vegetables (sales ratio) | Fruits | *See above* – Minimally processed foods: Fruits |
| Vegetables | *See above* – Minimally processed foods: Vegetables |
| Processed fruits and vegetables | *See above* – Processed culinary ingredients: Processed fruits and vegetables |

**Definitions as provided in 2017; Available from:* *http://www.portal.euromonitor.com/help/definitions (subscription required)*

## Model fit graphs, model output, and sensitivity analyses

## Model fit graphs


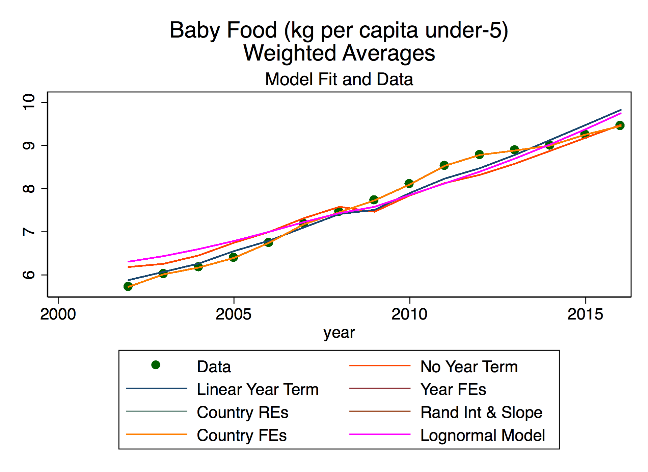

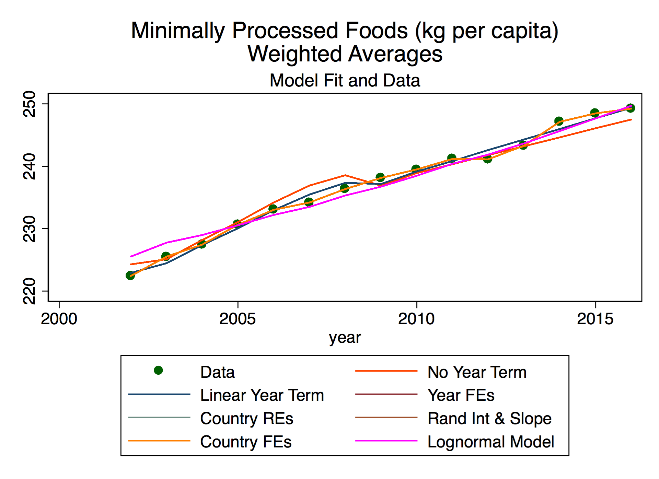

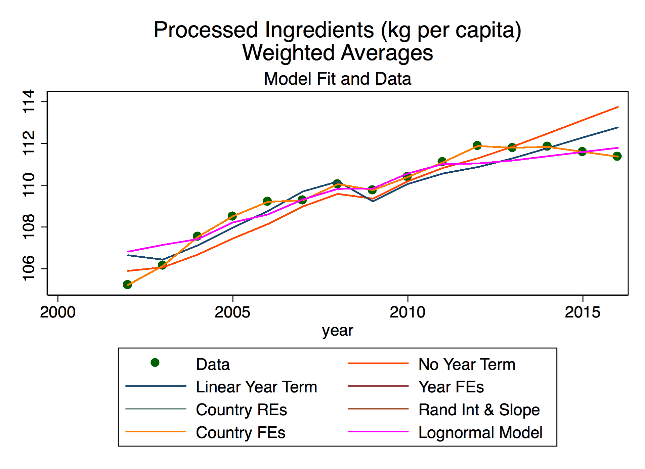

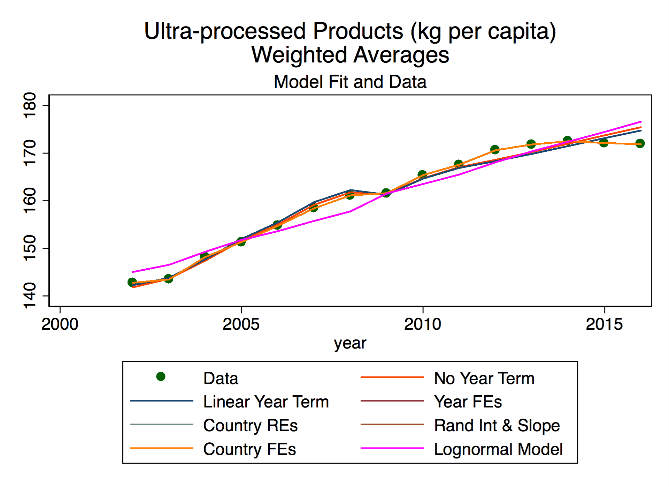


**FEs = fixed effects; REs = random intercepts; Rand Int & Slope = random intercept and random slope*

**Model fits for all models with year fixed effects (with addition of: country random intercept, country random intercept and random slope, or country fixed effects) are shown but are indistinguishable.*

## Model output

### Main model – full output

| **Variable** | **Minimally processed foods** | **Processed culinary ingredients** | **Ultra-processed products** | **Baby Food** |
| --- | --- | --- | --- | --- |
| **FTA membership** | -1.189  *(0.231)* | -0.461 *(0.331)* | -1.647  *(.123)* | -0.278  *(0.131)* |
| **FTA membership*year** | -0.222  *(0.520)* | 0.806***  *(<.001)* | 0.888*  *(.016)* | 0.173**  *(0.005)* |
| **GDPpc (log)**  **(2011 Int $)** | 11.55*  *(0.034)* | *23.69*** (<.001)* | 123.1*** *(<.001)* | 6.942*** *(<.001)* |
| **Urbanization rate (%)** | 1.681***  *(<.001)* | -0.206 *(0.397)* | -1.398** *(.003)* | -0.073* *(0.012)* |
| **FLFP rate**  **(%)** | -0.079  *(0.663)* | -0.187* *(0.034)* | 0.839***  *(<.001)* | 0.022  *(.363)* |
| **2002** | (ref) | (ref) | (ref) | (ref) |
| **2003** | 2.24  *(0.028)** | 0.650  *(0.184)* | -0.868  *(0.423)* | 0.210  *(0.262)* |
| **2004** | 3.14  *(0.011)** | 1.08  *(0.073)* | -1.56  *(0.224)* | 0.100  *(0.626)* |
| **2005** | 5.35  *(<.001)**** | 1.20  *(0.114)* | -3.21  *(0.041)** | 0.071  *(0.761)* |
| **2006** | 6.75  *(<.001)**** | 0.817  *(0.386)* | -5.13  *(0.008)*** | 0.133  *(0.622)* |
| **2007** | 6.98  *(0.002)*** | -0.214  *(0.851)* | -7.11  *(0.002)*** | (0.246)  *(0.431)* |
| **2008** | 8.36  *(0.001)*** | -0.150  *(0.909)* | -7.49  *(0.004)*** | (0.330)  *(0.350)* |
| **2009** | 9.93  *(0.001)*** | -0.314  *(0.829)* | -5.75  *(0.047)** | 0.654)  *(0.099)* |
| **2010** | 10.39  *(0.001)*** | -0.843  *(0.611)* | -7.20  *(0.028)** | 0.698  *(0.117)* |
| **2011** | 11.26  *(0.002)*** | -1.11  *(0.548)* | -8.97  *(0.014)** | 0.875  *(0.076)* |
| **2012** | 10.64  *(0.008)*** | -1.08  *(0.593)* | -8.62  *(0.031)** | 0.931  *(0.087)* |
| **2013** | 12.18  *(0.005)*** | -2.06  *(0.353)* | -10.51  *(0.016)** | 0.807  *(0.175)* |
| **2014** | 15.46  *(0.001)*** | -2.68  *(0.262)* | -11.70  *(0.013)** | 0.757  *(0.241)* |
| **2015** | 16.28  *(0.001)*** | -3.59  *(0.163)* | -13.92  *(0.006)*** | 0.847  *(0.225)* |
| **2016** | 16.61  *(0.002)*** | -4.35  *(0.113)* | -15.36  *(0.004)*** | 0.919  *(0.220)* |
| **Intercept** | 226.8***  *(<.001)* | 109.1***  *(<.001)* | 164.4***  *(<.001)* | 6.898***  *(<.001)* |
| **Random effects** |  |  |  |  |
| **var(intercept)**  **SE** | 3003.1  694.4 | 1183.2  273.9 | 5558.8  1309.1 | 3.87  0.955 |
| **var(slope)**  **SE** | 4.54  1.11 | 0.970  0.222 | 3.56  0.841 | 0.087  0.020 |
| **cov(int., slope)**  **SE** | 65.5  21.3 | -3.13  5.52 | 44.51  23.75 | 0.105  0.111 |
| **var(residual)**  **SE** | 18.1  1.13 | 4.09  0.254 | 20.85  1.30 | 0.657  0.041 |

*p<=0.05; **p<=0.01; ***p<=0.001

## Sensitivity analyses

(Output displayed for FTA membership variables only)

### I. Modelled data excluded

| **Variable** | **Minimally processed foods** |
| --- | --- |
| **FTA membership** | -1.703  *(.141)* |
| **FTA membership *year** | -0.084  *(.833)* |

### II. Products with high missingness excluded (ready-to-drink coffee, ready-to-drink tea)

| **Variable** | **Ultra-processed products** |
| --- | --- |
| **FTA membership** | -1.55  *(.145)* |
| **FTA membership *year** | 0.736*  *(.048)* |

### III. Venezuela excluded from unexposed group

| **Variable** | **Minimally processed foods** | **Processed culinary ingredients** | **Ultra-processed products** | **Baby Food** |
| --- | --- | --- | --- | --- |
| **FTA membership** | -2.209***  *(<.001)* | -0.228  *(.321)* | -1.151  *(0.059)* | -0.253*  *(.014)* |
| **FTA membership *year** | 0.316  *(.146)* | 0.796***  *(<.001)* | 0.305  *(0.156)* | 0.135***  *(<.001)* |

1. **Figures by country and outcome: Annual per capita sales volumes (unadjusted for covariates) in individual exposed countries versus mean sales volumes in matched unexposed countries, 2002 to 2016**

Vertical bars in each figure indicate the year each country’s U.S. FTA entered into force.

**Minimally processed foods**

**
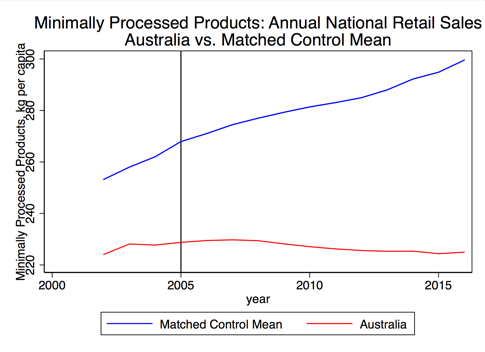

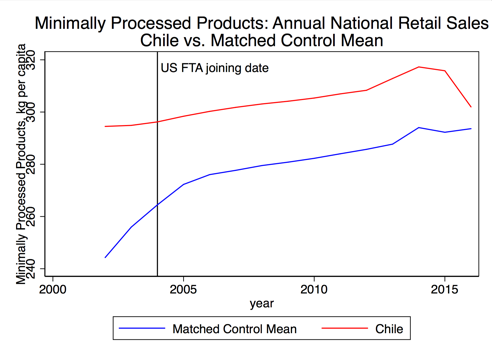
**

**
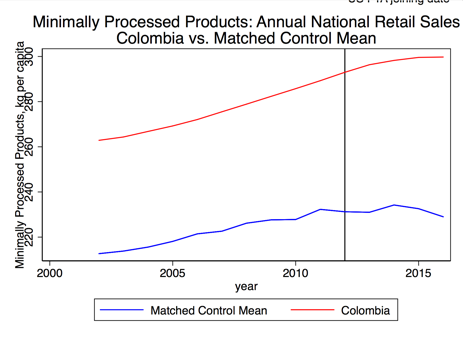

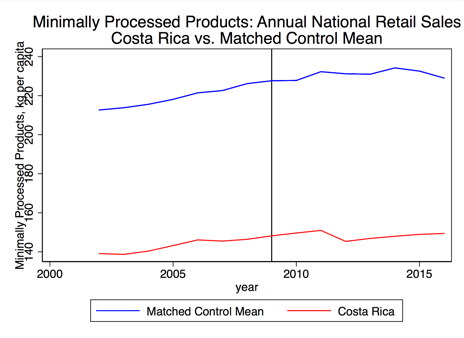
**

**
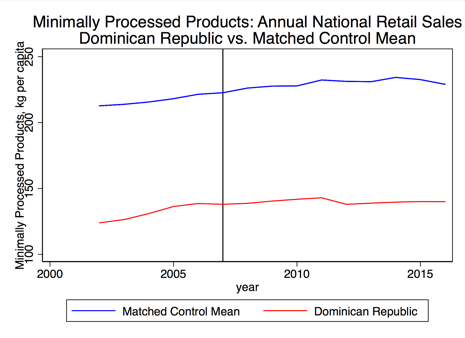

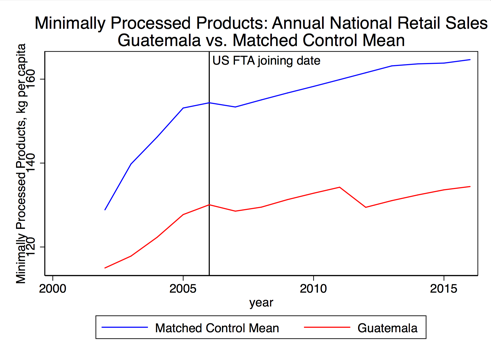
**

**
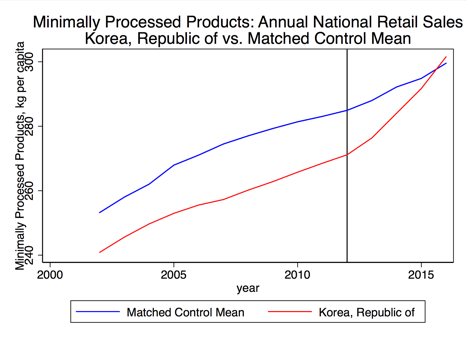

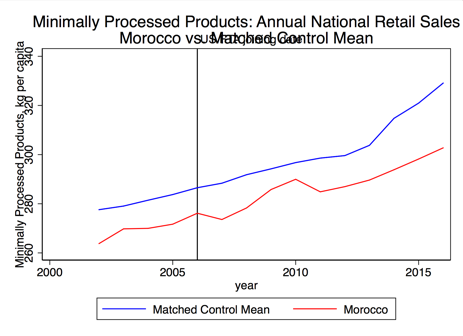
**

**
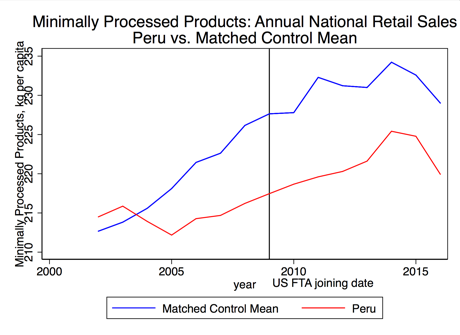

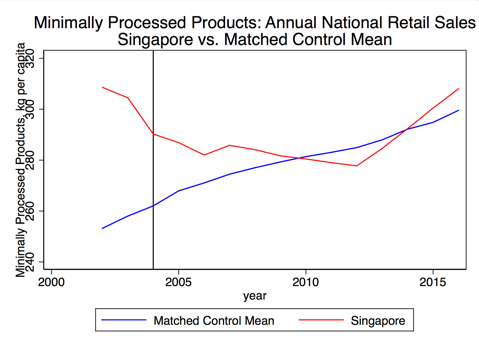
**

**Processed culinary ingredients**

**
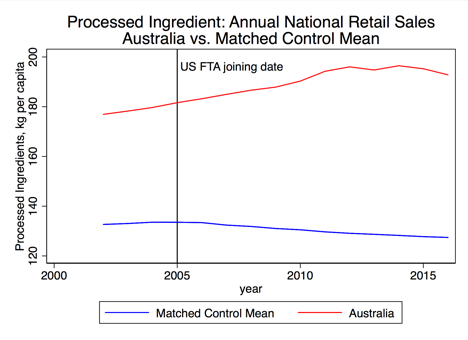

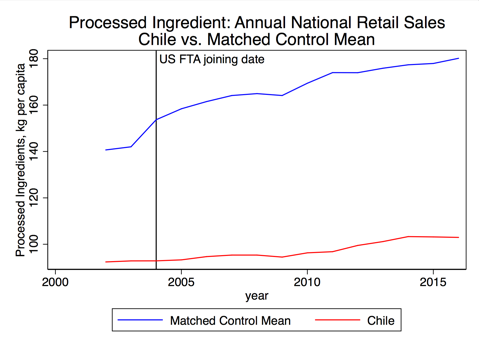
**

**
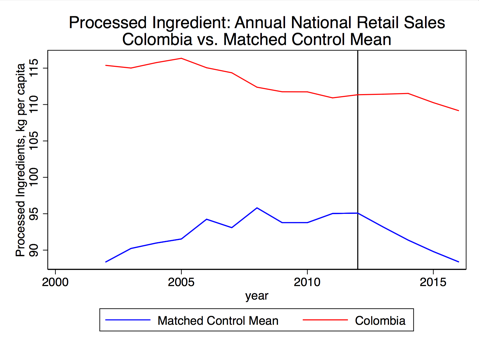

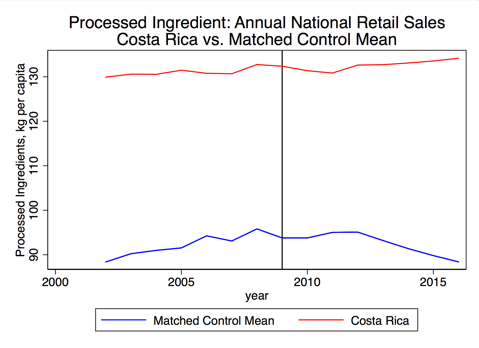
**

**
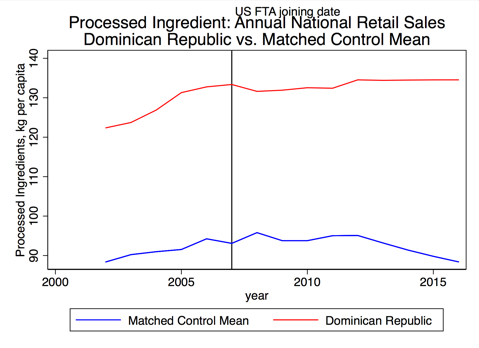

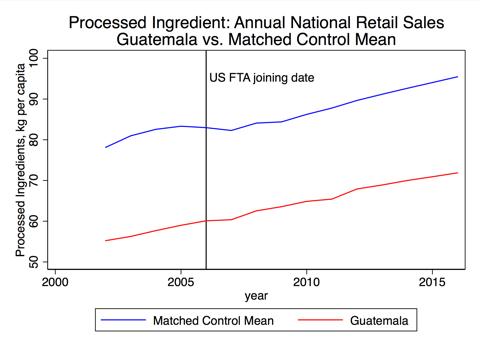
**

**
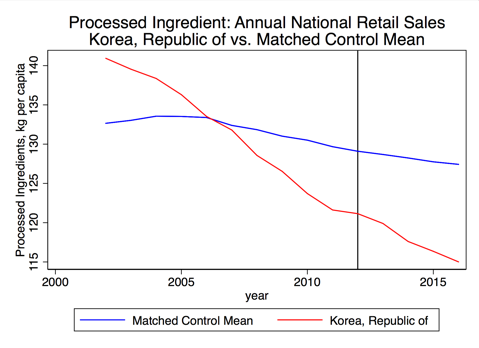

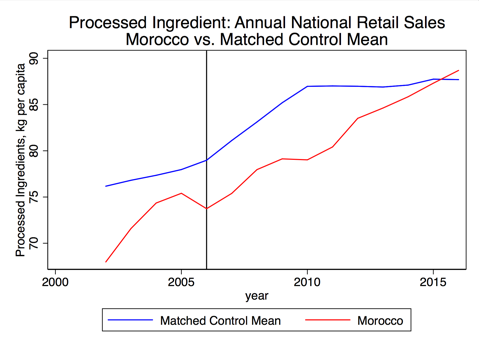
**

**
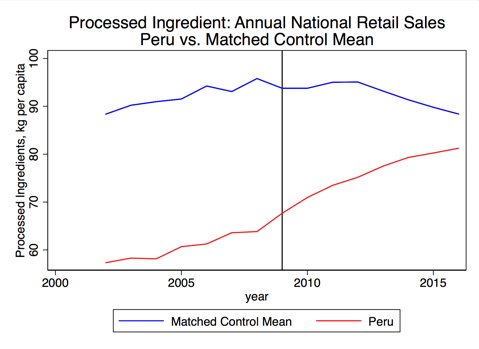

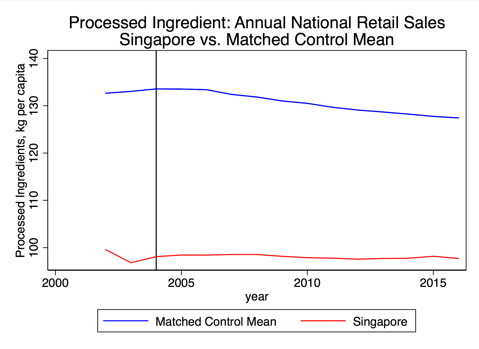
**

**Ultra-processed products**

**
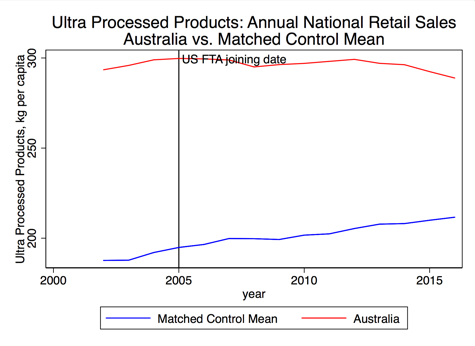

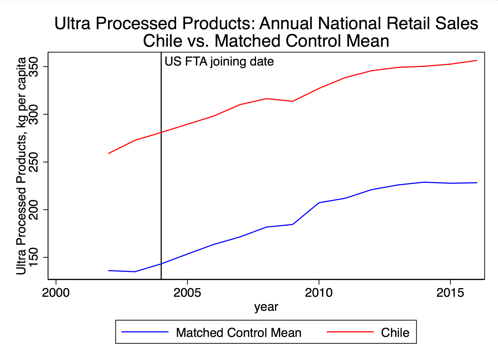
**

**
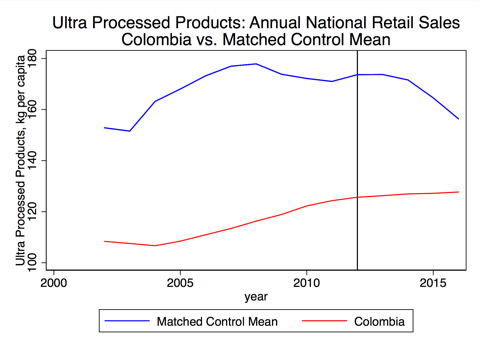

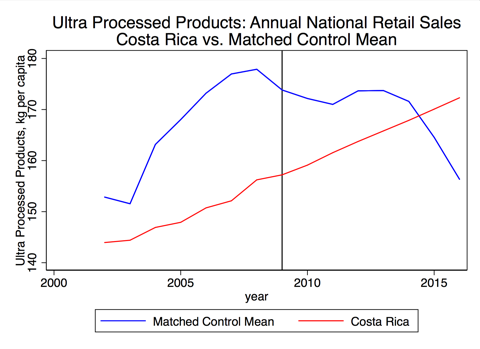
**

**
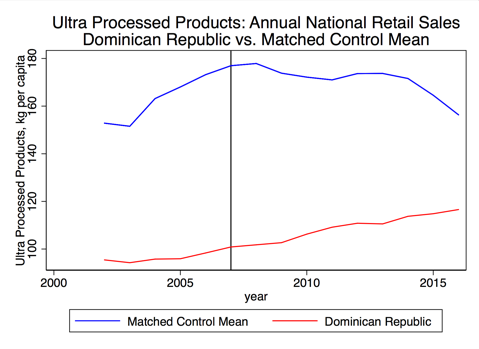

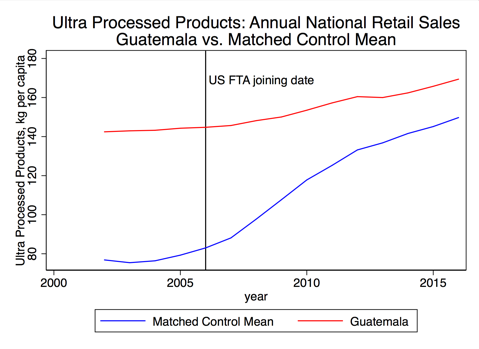
**

**
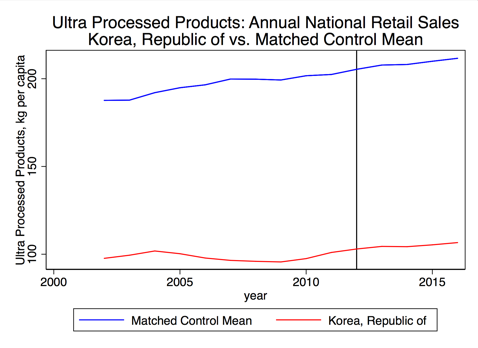

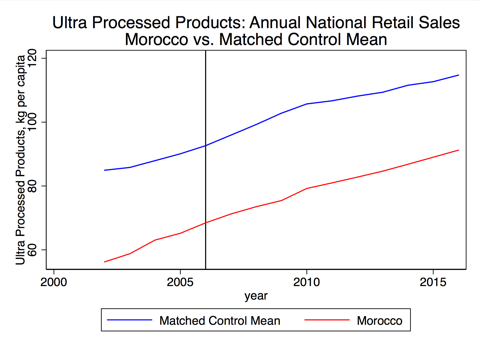
**

**
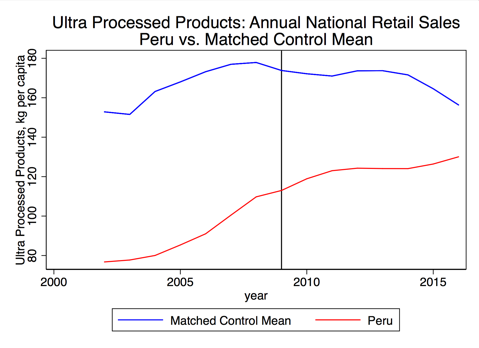

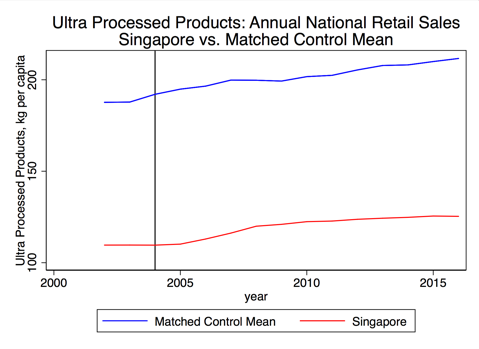
**

**Baby food**

**
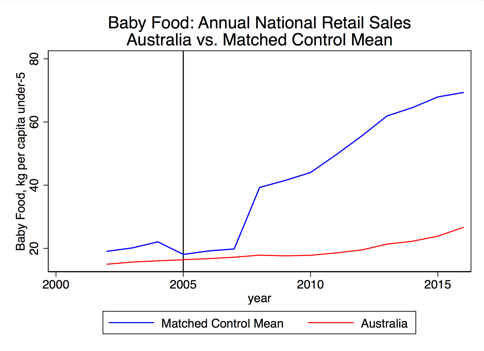

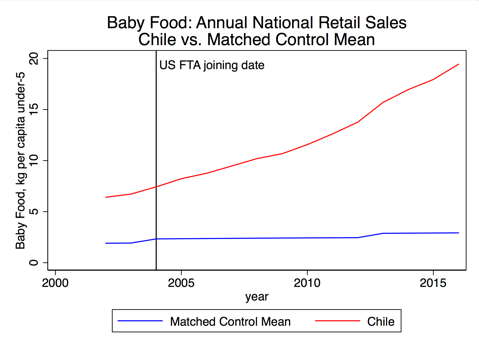
**

**
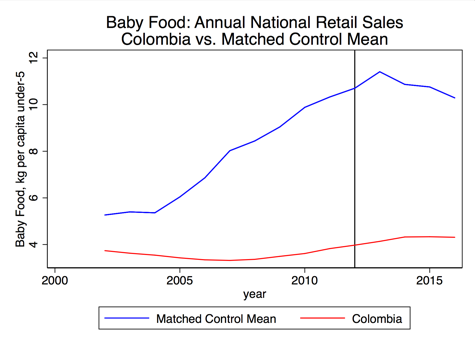

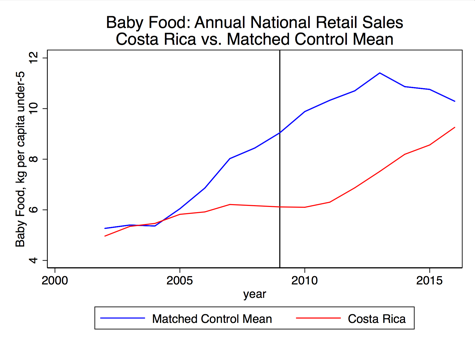
**

**
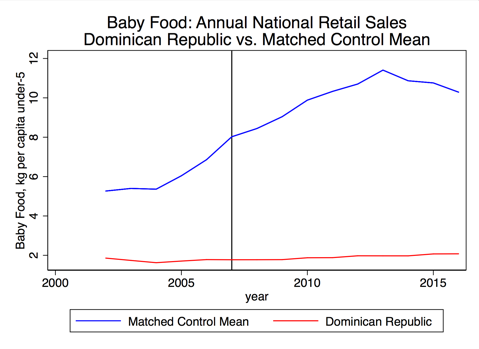

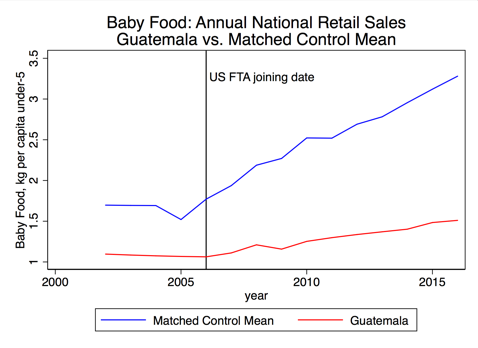
**

**
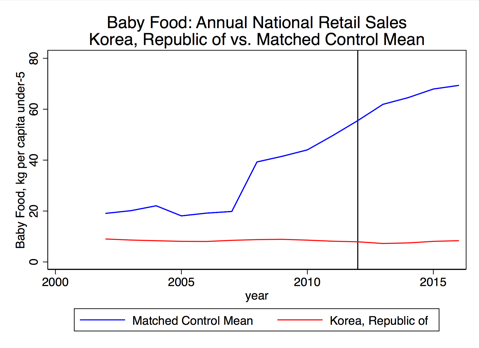

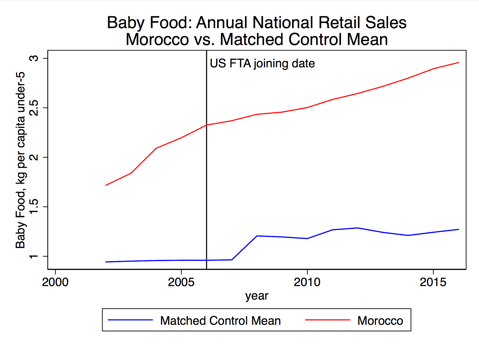
**

**
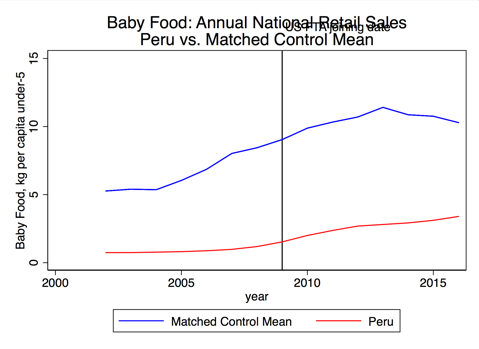

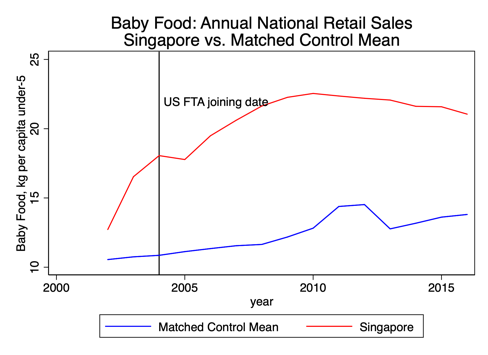
**
